# Supplementary material for: Entomopathogenic microbial potential in the management of Fall Armyworm, Spodoptera frugiperda (J.E. Smith) in Maize Production
Source: Research Square preprint supplement (doi:10.21203/rs.3.rs-7022858/v1), 2025-07-07
Supplement: Supplementary file 1 [file 2bc0fb277e4ec82259553acd.xlsx]

## Sheet: Sheet1
TREATMNT	YEAR	VARIETY	PLNT STAND	DAY SILK
1	1	SUSWAN	13	46
2	1	SUSWAN	19	48
3	1	SUSWAN	23	56
4	1	SUSWAN	30
5	1	SUSWAN	30
6	1	SUSWAN	27
7	1	SUSWAN	36
1	1	SUSWAN	13
2	1	SUSWAN	17
3	1	SUSWAN	13
4	1	SUSWAN	37
5	1	SUSWAN	29
6	1	SUSWAN	22
7	1	SUSWAN	13
1	1	SUSWAN	23
2	1	SUSWAN	28
3	1	SUSWAN	33	56
4	1	SUSWAN	11
5	1	SUSWAN	10
6	1	SUSWAN	22
7	1	SUSWAN	28
1	1	SUSWAN	9
2	1	SUSWAN	33
3	1	SUSWAN	35
4	1	SUSWAN	6
5	1	SUSWAN	23
6	1	SUSWAN	20
7	1	SUSWAN	36
			23
			8	59
			10	60
			33
			35
			33	60
			31	61
			10
			13	60
			14
			33	59
			36
			40
			5
			37
			28	59
			40	58
			19	60
			6
			23	60
			28
			13
			33
			34	61
			5
			15
			13
			22
			29	59
			PLANT stand	DAY to silk
			9
			17
			28
			33
			13
			33	56
			35
			30
			37
			11
			6
			30
			29
			10
			23
			27
			22
			22
			20
			36
			13
			28
			36
			13
			9
			23
			8	59
			13	60
			28	59
			33
			10	60
			14
			40	58
			34	61
			33
			33	59
			19	60
			5
			35
			36
			6
			15
			33	60
			40
			23	60
			13
			31	61
			5
			28
			22
			10
			37
			13
			29	59
